# Supplementary material for: Dynamic evolution of clonal epialleles revealed by methclone
Source: PubMed Central journal article supplement (PMC4242486; doi:10.1186/s13059-014-0472-5), 2014-09-27
Supplement: 13059_2014_472_MOESM1_ESM.pdf [file 13059_2014_472_MOESM1_ESM.pdf]

(a)

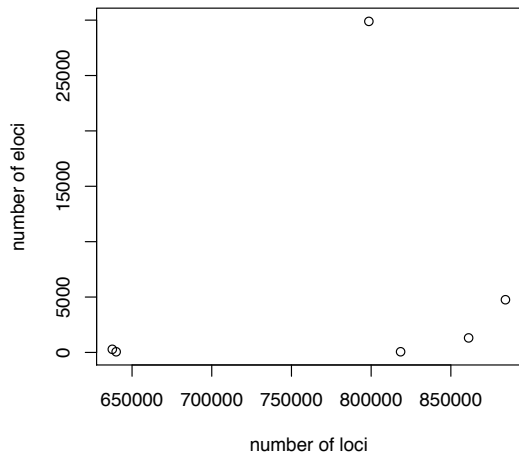

(b)

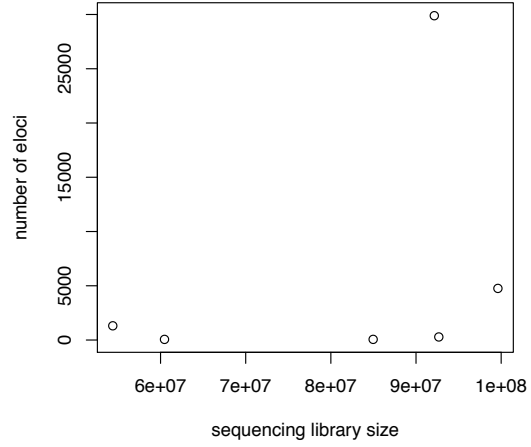

**Figure G1. The number of eloci against the number of loci covered (a) and sequencing library size (b).** The correlation is 0.21 (a) and 0.36 (b). Both p-values for the test of Pearson correlation is greater than 0.1.  $\Delta S$  cutoff is -70.

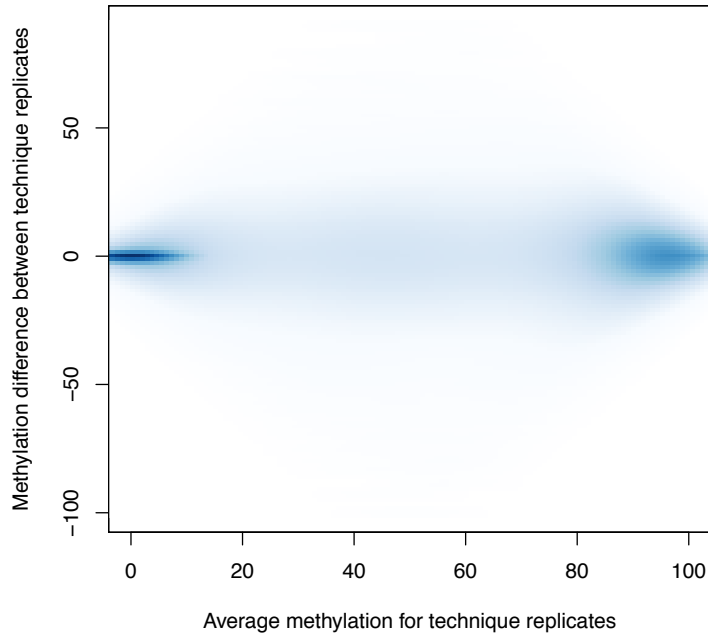

**comparison between technical replicates**

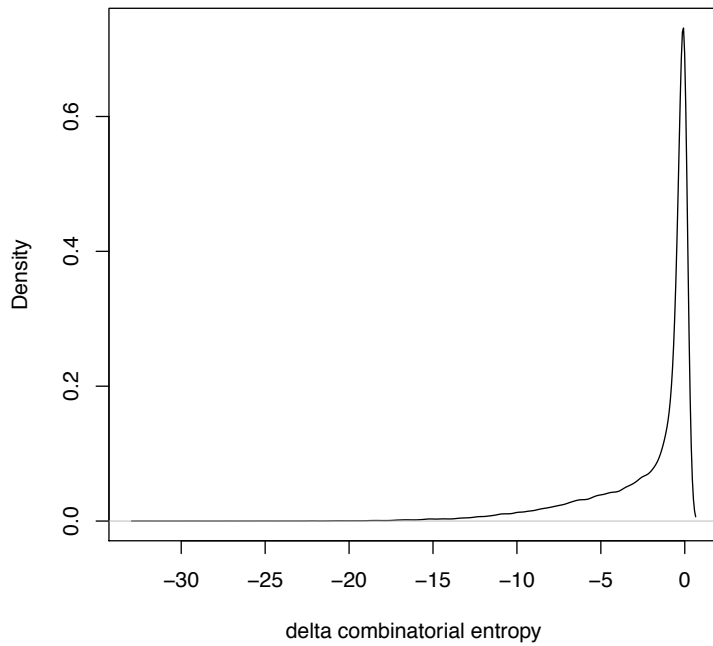

**Figure G2. Technical reproducibility of RRBS and  $\Delta$**  **S.** (top) Methylation difference against average methylation between technique replicates for AML6, where we observed very high concordance of methylation measures ( $R^2=0.98$ ). (bottom) The density plot of the delta combinatorial entropy between two technical replicates of sample AML6.

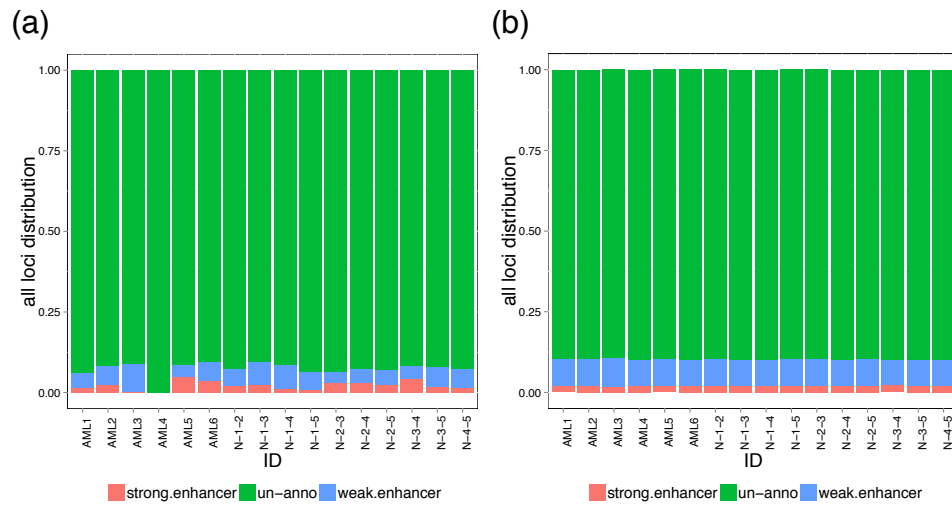

**Figure G3. No enrichment for Enhancer for eloci from NBM samples.** We plotted the proportion of eloci that show enrichment for strong enhancers (red), weak enhancers (blue), or un-annotated areas of the intergenic sites (green). (a) For the AML and NBM samples, we observed most sites as non-enhancers, although some samples showed a depletion of these marks (e.g. AML3). (b) The global distribution of covered loci is the same for all samples.

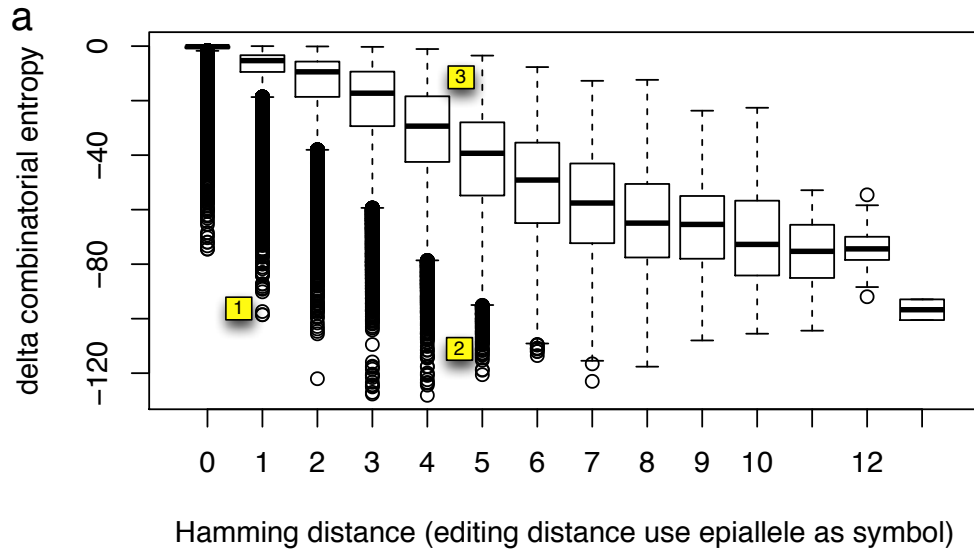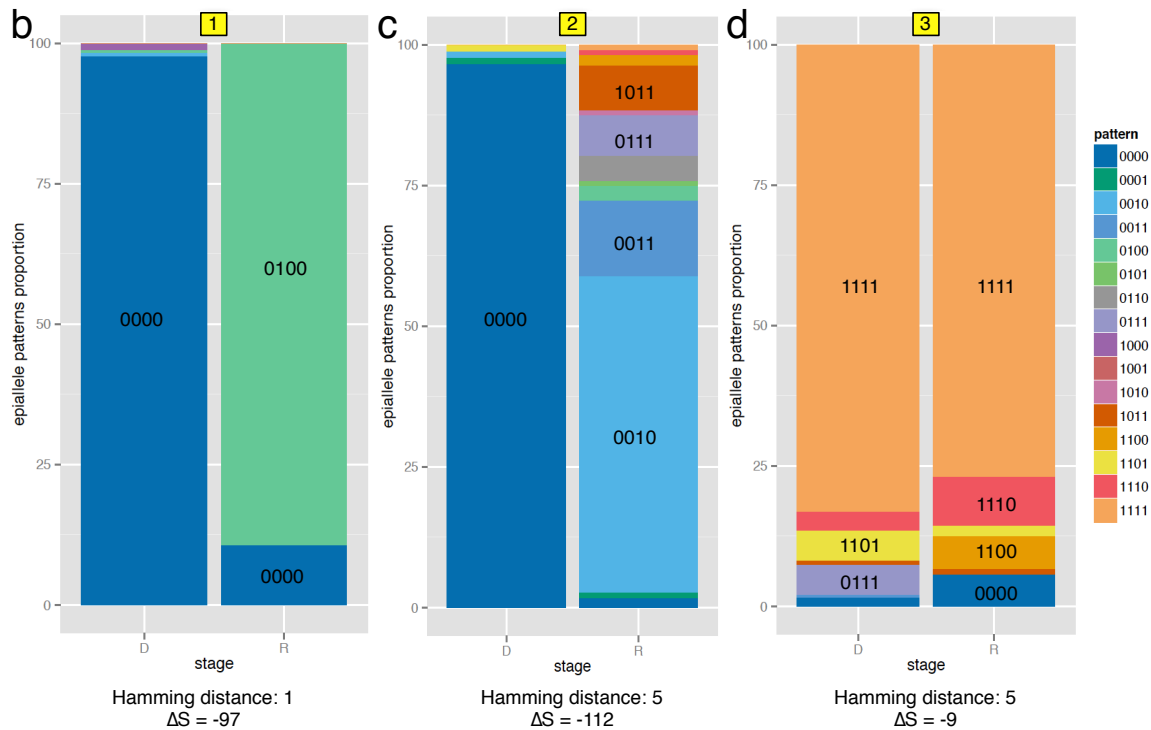

**Figure G4. Hamming distance vs. delta combinatorial entropy ( $\Delta$ )**

(a) We used a boxplot to show, given a higher hamming distance, the lower the median  $\Delta S$ . (b) Example 1 with low hamming distance (1) but high  $\Delta S$  (-97). (c) Example 2 with high hamming distance (5), and high  $\Delta S$  (-112). (d) Example 3 with high hamming distance (5), but low  $\Delta S$  (-9). Note, hamming distance was calculated using the existence of any epiallele (> 5%) as symbol, which were marked in (b-d).

S).

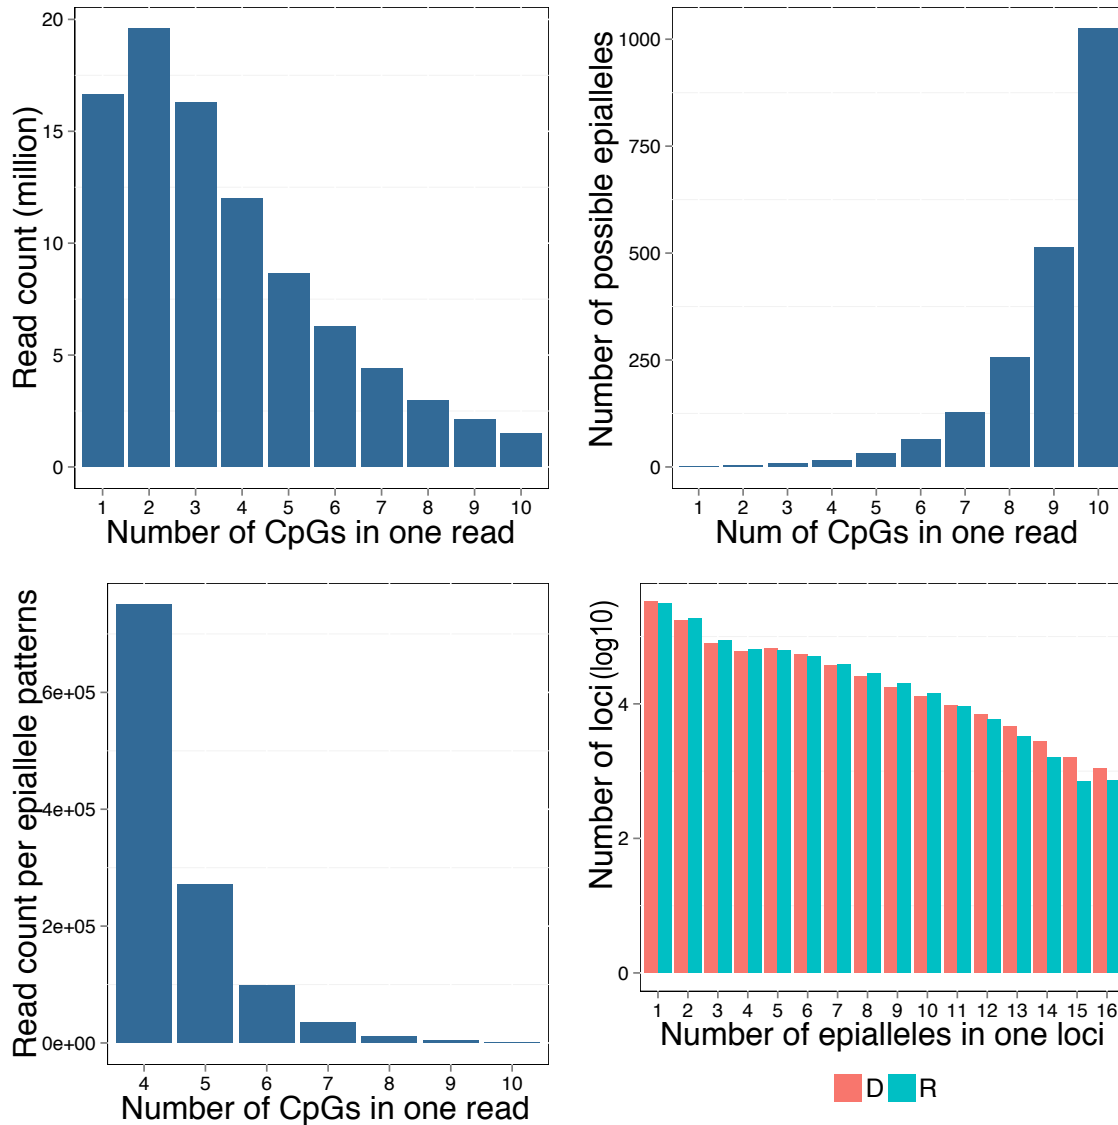

**Figure S5. Coverage of CpGs by sequencing data.** (a) The frequency of reads with 1 to 10 CpGs in one read. (b) The number of possible epiallele patterns with 1 to 10 CpGs in one read. (c) Read count per epiallele pattern for reads with 4 to 10 CpGs in one read. (d) The actual number of observed epialleles at each locus for diagnosis sample and relapse sample. Data from AML2 were used for calculation.

| 4    | 3                            | 2                                            | 1                            | 0    |
|------|------------------------------|----------------------------------------------|------------------------------|------|
| ●●●● | ○●●●<br>●○●●<br>●●○●<br>●●●○ | ○○●●<br>●○○●<br>●●○○<br>○●●○<br>○●○●<br>●○○○ | ○○○●<br>●○○○<br>○●○○<br>○○●○ | ○○○○ |

**Figure S6. 16 patterns of epialleles defined by 4 CpGs within one read.** This schematic shows the 16 possible states of epialleles, given the number of methylated CpGs (1,2,3,4) out of four possible (top). Filled circles represent methylated CpGs; open circles represent un-methylated CpGs.

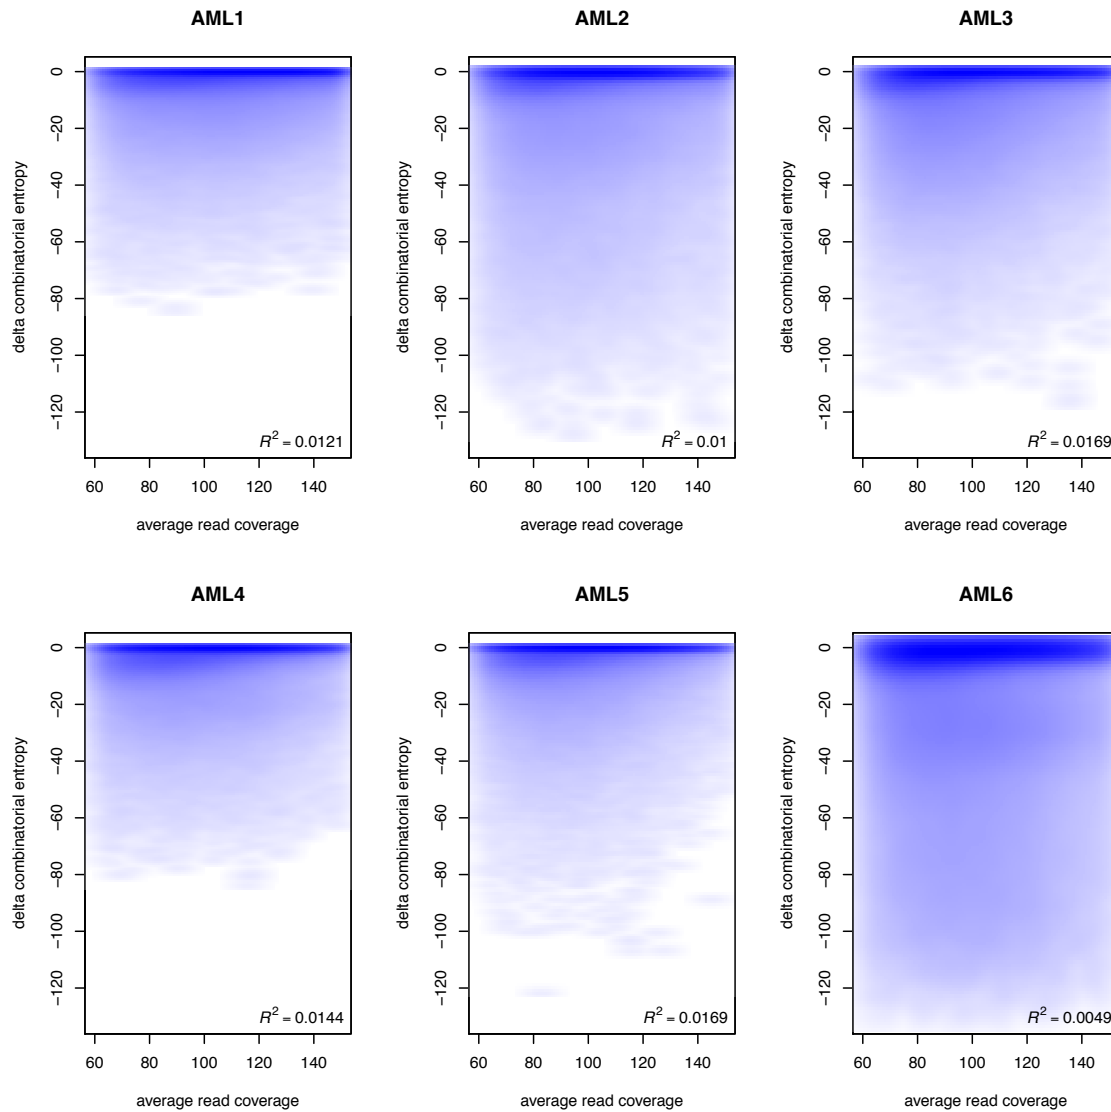

**Figure S7. Average read coverage against delta combinatorial entropy.** We plotted a density plot of all points showing the average coverage (x-axis) of the eloci with varying  $\Delta S$  (y-axis), which showed no strong correlation (Pearson,  $R^2$ ).

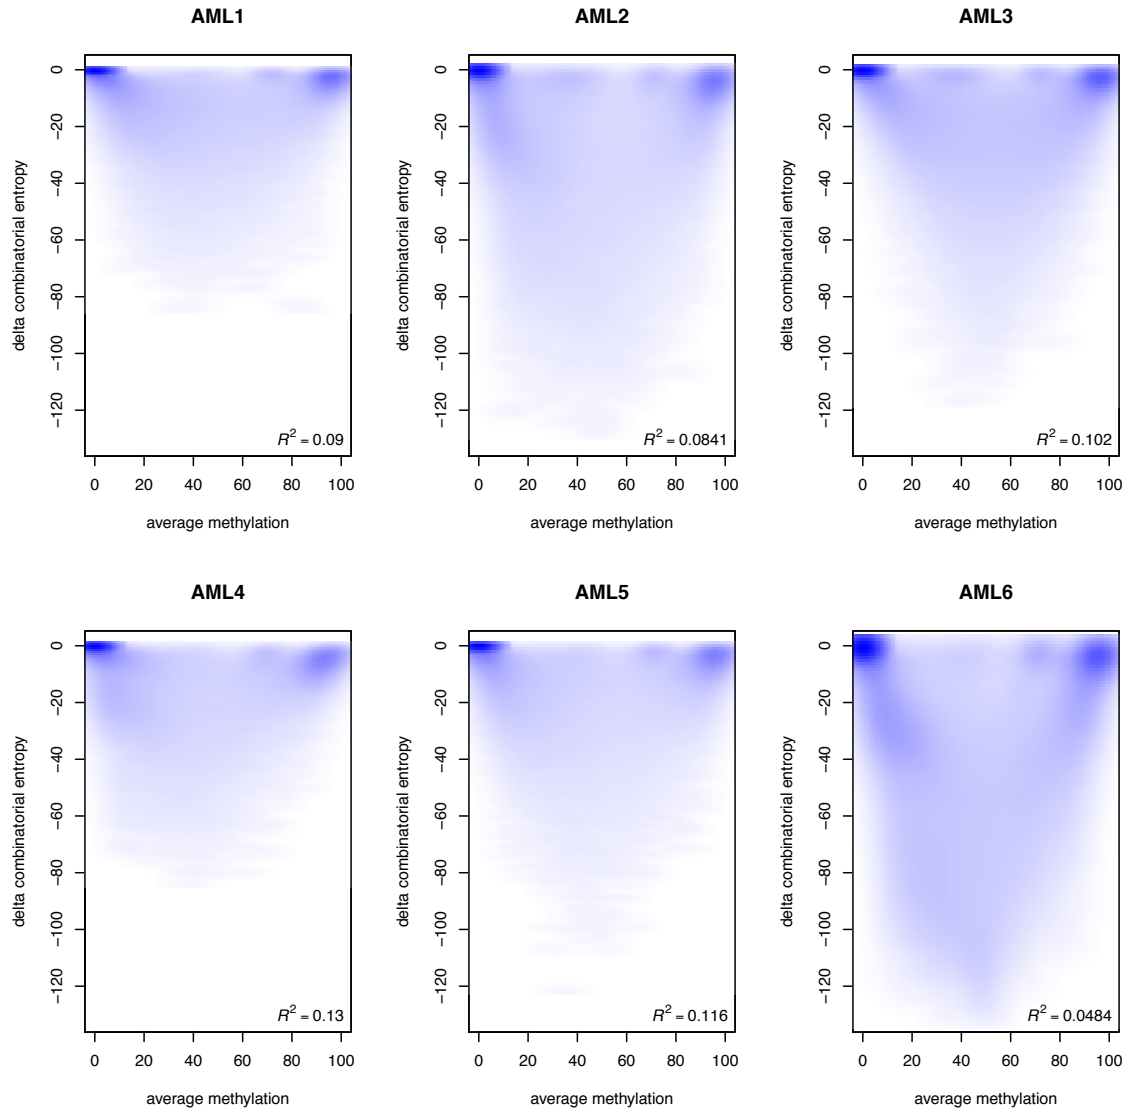

**Figure S8. Average DNA methylation against delta combinatorial entropy.** We plotted a density plot of all points showing the average methylation (x-axis) of the loci with varying  $\Delta S$  (y-axis), which showed a no strong correlation (Pearson,  $R^2$ ). As expected, semi-methylated loci show a greater changes of being called a eloci, since there are more directions for the change to proceed (up and down).



**Supplementary Table 1. Clinical information for AML patients.**

| ID   | Sex | Age | FAB*         | Death Time | Relapse Time |
|------|-----|-----|--------------|------------|--------------|
| AML1 | M   | 62  | M4           | 402        | 266          |
| AML2 | F   | 50  | M2           | 1469       | 637          |
| AML3 | F   | 67  | biphenotypic | 967        | 604          |
| AML4 | M   | 54  | M2           | N/A        | 939          |
| AML5 | M   | 62  | M4           | 169        | 110          |
| AML6 | M   | 18  | M2           | N/A        | 606          |

\*FAB: AML classifications use French-American-British (FAB) system.
